# Supplementary material
Source: publisher figshare collection journal article supplement (https://sage.figshare.com/ndownloader/files/17497019)
Supplement: Supplementary file 1 [file 17497019]

Reviewer 2 v.2

Comments to the author:

Paper has been adjusted satisfactory, the explanations are reasonable
